# Supplementary material
Source: publisher figshare collection journal article supplement (https://acs.figshare.com/ndownloader/files/4025356)
Supplement: Supplementary file 1 [file 4025356]

# New {RuNO} polyoxometalate

## $[\text{PW}_{11}\text{O}_{39}\text{Ru}^{\text{II}}(\text{NO})]^{4-}$ : synthesis and reactivity

Maxim N. Sokolov,\* Sergey A. Adonin, Dmitry A. Mainichev, Pavel L. Sinkevich, Cristian Vicent, Nikolay B. Kompankov, Artem L. Gushchin Vladimir A. Nadolinnyi and Vladimir P. Fedin

### Contents

#### Electrospray ionization mass spectrometry

**Figure S1.** Simulated and experimental peaks for the triply-charged  $[\mathbf{2} + \text{H}]^{3-}$  and  $[\mathbf{2} + \text{TBA}]^{3-}$  (bottom) and doubly-charged  $[\mathbf{2} + \text{H} + \text{TBA}]^{2-}$  and  $[\mathbf{2} + 2\text{TBA}]^{2-}$  (top) anions.

#### NMR spectroscopy

**Figure S2.**  $^{31}\text{P}$  NMR spectra of reaction solution ( $[\text{PW}_{11}\text{O}_{39}]^{7-} + \text{K}_2[\text{Ru}(\text{NO})\text{Cl}_5]$ , reflux) after 16 and 31 h.

**Figure S3.**  $^{31}\text{P}$  NMR monitoring of reaction between  $[\text{PW}_{11}\text{O}_{39}\text{Ru}(\text{NO})]^{4-}$  and  $\text{N}_2\text{H}_4 \cdot \text{H}_2\text{SO}_4$  at RT

**Figure S4.**  $^{31}\text{P}$  NMR monitoring of reaction between  $[\text{PW}_{11}\text{O}_{39}\text{Ru}(\text{NO})]^{4-}$  and  $\text{N}_2\text{H}_4 \cdot \text{H}_2\text{SO}_4$  at 60°C

#### Electrospray ionization mass spectrometry

A Q-TOF premier mass spectrometer with an orthogonal Z-spray electrospray source (Waters, Manchester, UK) was used. The temperature of the source block was set to 100 °C and the desolvation temperature to 120 °C. A capillary voltage of 3.3 kV was used in the negative scan mode and the cone voltage was set to 5 V to control the extent of fragmentation of the identified species. TOF mass spectra were acquired in the W-mode operating at a resolution of ca. 15000 (FWHM). Mass calibration was performed using a solution of sodium iodide in isopropanol:water (50:50) from  $m/z$  50 to 3000. Sample solutions were infused via syringe pump directly connected to the ESI source at a flow rate of 10  $\mu\text{L}/\text{min}$ . The observed isotopic pattern of each compound perfectly matched the theoretical isotope pattern calculated from their elemental composition using the MassLynx 4.1 program. For ESI tandem MS/MS experiments, the anions of interest were mass-selected using the first quadrupole (Q1) and interacted with argon in the T-wave collision cell at variable collision energies ( $\text{CE} = 0\text{--}20\text{ eV}$ ). The ionic products of fragmentation were analyzed with the time-of-flight analyzer. The isolation width was reduced to mass-select a single isotopomer in the first quadrupole analyser.

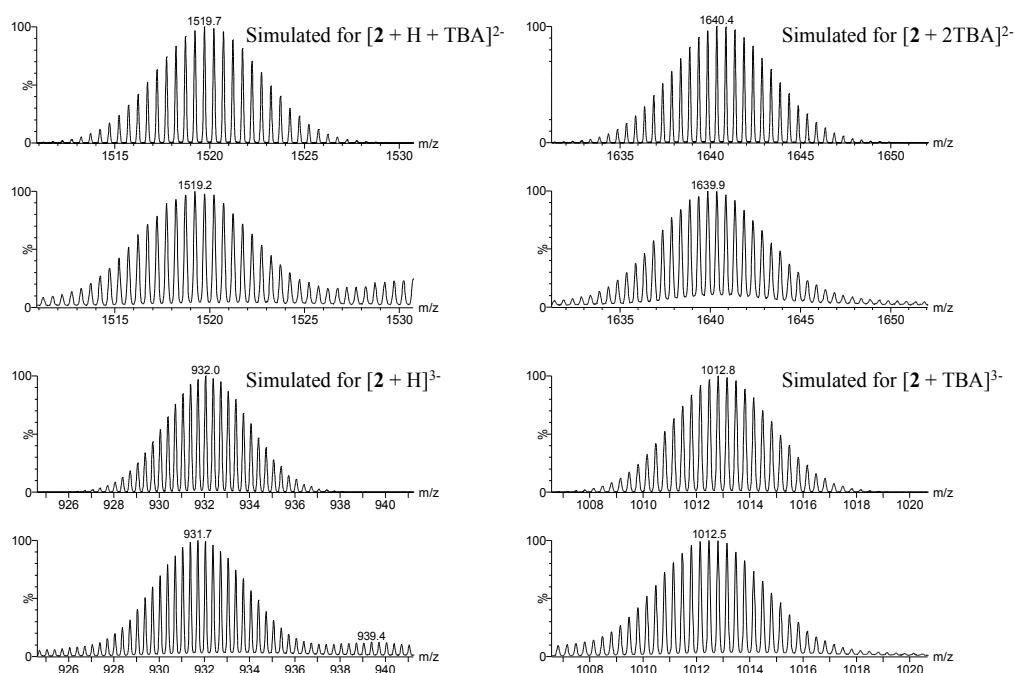

**Figure S1.** Simulated and experimental peaks for the triply-charged  $[2 + H]^{3-}$  and  $[2 + TBA]^{3-}$  (bottom) and doubly-charged  $[2 + H + TBA]^{2-}$  and  $[2 + 2TBA]^{2-}$  (top) anions.

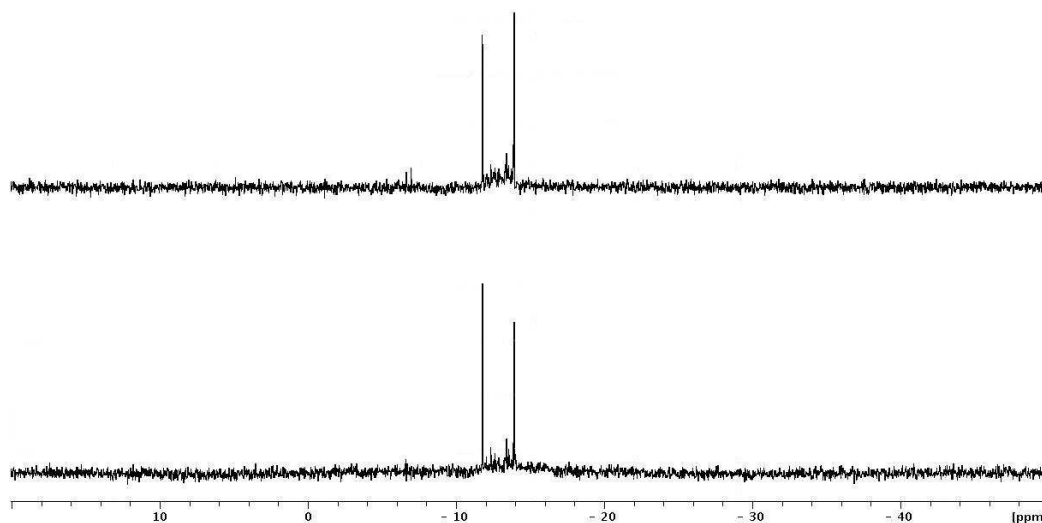

**Figure S2.**  $^{31}\text{P}$  NMR spectra of reaction solution ( $[\text{PW}_{11}\text{O}_{39}]^{7-} + \text{K}_2[\text{Ru}(\text{NO})\text{Cl}_5]$ , reflux) after 16 (bottom) and 31 (top) h. Left peak –starting POM, right peak – product.

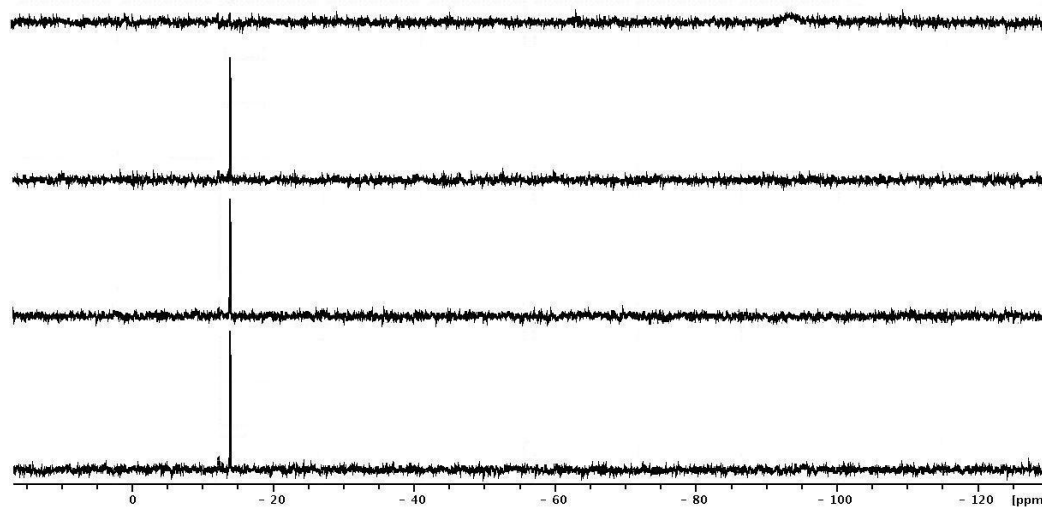

**Figure S3.**  $^{31}\text{P}$  NMR monitoring of reaction between  $[\text{PW}_{11}\text{O}_{39}\text{Ru}(\text{NO})]^{4-}$  and  $\text{N}_2\text{H}_4 \cdot \text{H}_2\text{SO}_4$  at RT (after 5 min, 50 min, 70 min and 96 h, respectively)

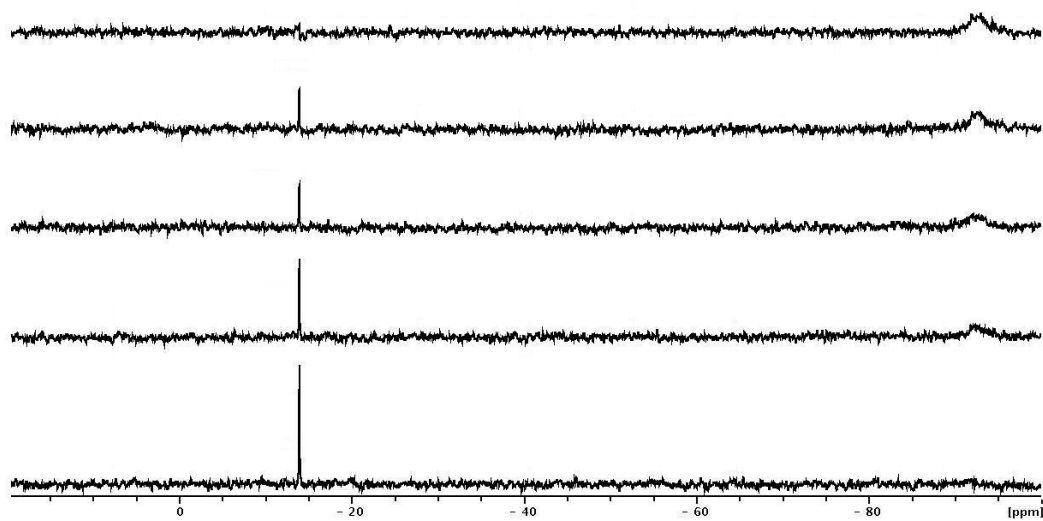

**Figure S4.**  $^{31}\text{P}$  NMR monitoring of reaction between  $[\text{PW}_{11}\text{O}_{39}\text{Ru}(\text{NO})]^{4-}$  and  $\text{N}_2\text{H}_4\cdot\text{H}_2\text{SO}_4$  at  $60^\circ\text{C}$  (after 2.5 h, 5 h, 6.5 h and 24 h)

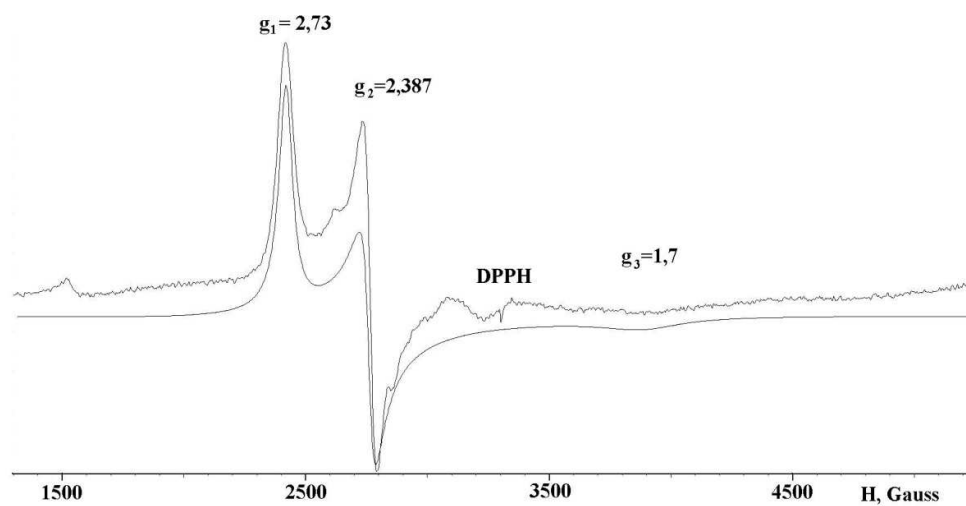

**Figure S5.** EPR spectrum of  $(\text{Bu}_4\text{N})_4[\text{PW}_{11}\text{O}_{39}\text{Ru}^{\text{III}}(\text{NH}_3)]$

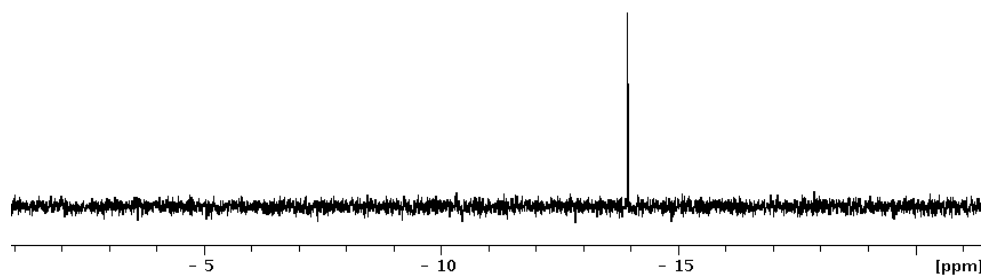

**Figure S7.**  $^{31}\text{P}$  NMR spectra of  $[\text{PW}_{11}\text{O}_{39}\text{Ru}(\text{NO})]^{4-}$  (solution after hydrothermal reaction between  $[\text{PW}_{11}\text{O}_{39}]^{7-}$  and  $\text{K}_2[\text{Ru}(\text{NO})\text{Cl}_5]$ ,  $\text{H}_2\text{O} + \text{D}_2\text{O}$ )

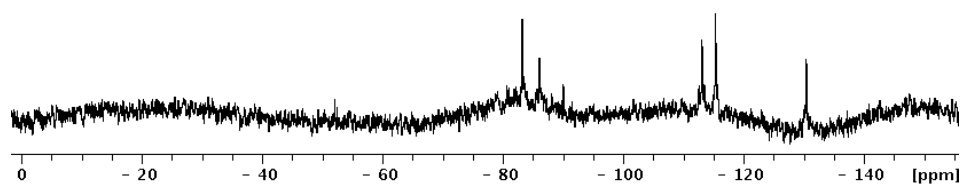

**Figure S8.**  $^{183}\text{W}$  NMR spectra of  $(\text{Bu}_4\text{N})_4[\text{PW}_{11}\text{O}_{39}\text{Ru}(\text{NO})]$  ( $\text{CD}_3\text{CN}$ )

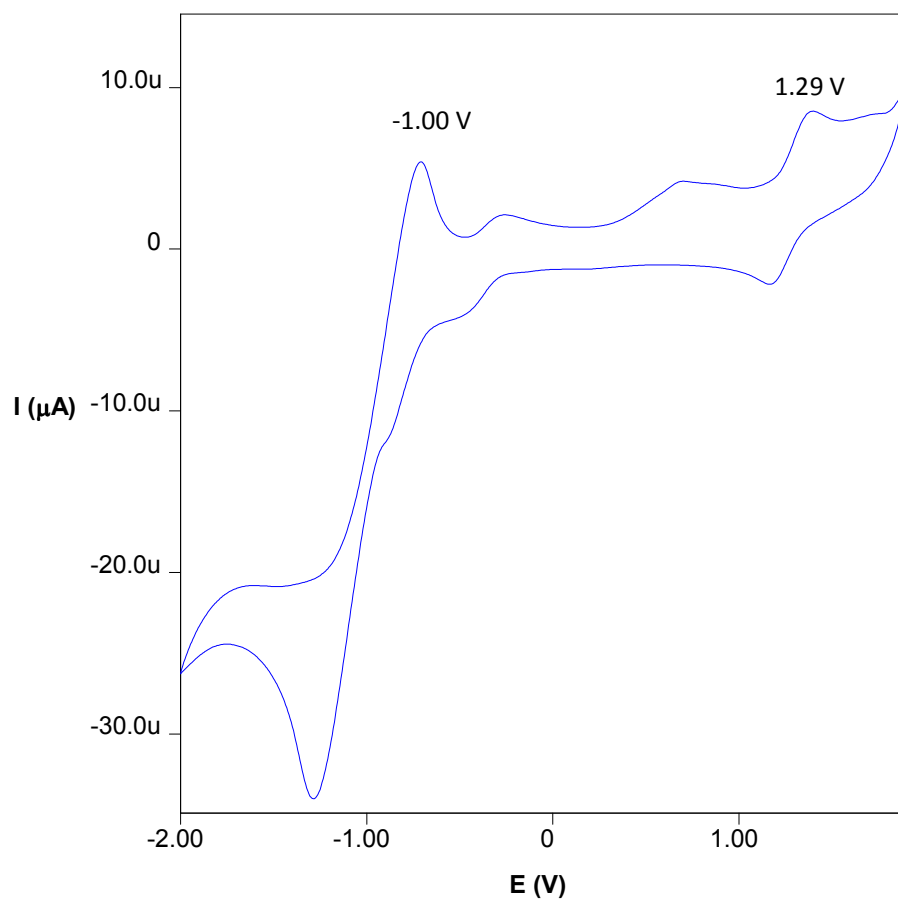

**Figure S9.** The cyclic voltammogram of **1** in CH<sub>3</sub>CN in the potential route of -2  $\leftrightarrow$  1.8 V (scan rate of 0.1 V/s).
